## Empowering Research on Epilepsy Surgery Outcomes

Adam S. Dickey<sup>1\*</sup>, Robert T. Krafty<sup>2</sup>, and Nigel P. Pedersen<sup>1,3,4</sup>

<sup>1</sup> Division of Epilepsy, Department of Neurology, Emory University School of Medicine, 101 Woodruff Circle, Atlanta, GA 30322, USA.

<sup>2</sup> Department of Biostatistics and Bioinformatics, Emory University, 1518 Clifton Road, Atlanta, GA 30322, USA.

<sup>3</sup> Department of Biomedical Engineering, Emory University and the Georgia Institute of Technology, Atlanta, GA, USA.

<sup>4</sup> College of Medicine and Public Health, Flinders University, GPO Box 2100 Adelaide SA 5001, Australia.

(\*) Author to whom correspondence should be addressed:

Email: [adam.s.dickey@emory.edu](mailto:adam.s.dickey@emory.edu)

Adam Dickey, MD, PhD

Woodruff Memorial Research Building, Room 6209

101 Woodruff Circle

Atlanta, GA, 30322

Phone: (404) 778-3444      Fax: 404-251-2639

Text pages: 19      Body word count: 1785

References: 18      Figures: 1      Tables: 1      Appendix: 1

Key words: Epilepsy surgery, Engel outcome, Seizure freedom, Statistical power

## Low power in epilepsy surgery studies

5/11/22

### 1 **SHORT SUMMARY**

2           We performed a systematic review to determine the median statistical power of studies of  
3 epilepsy surgery outcomes, focused on stereoelectroencephalography. We extracted patient count  
4 data for comparisons of outcomes between two groups. We defined a clinically meaningful  
5 difference as the prognostic value of a normal versus abnormal MRI. Based on 69 studies, the  
6 median sample size was 38 patients, and the median statistical power was 24%.  
7 Underpowered studies will overestimate the size of true effects and are more likely to report false  
8 positive results. We discuss how statistical power, and thus reproducibility and reliability of results,  
9 can be improved.

10

11

## Low power in epilepsy surgery studies

5/11/22

### 12 **ABSTRACT**

13           Low statistical power is a recognized problem in many fields. We performed a systematic  
14 review to determine the median statistical power of studies of epilepsy surgery outcomes. We  
15 performed a PubMed search for studies reporting epilepsy surgery outcomes for the years 1980-  
16 2020, focusing on studies using stereoelectroencephalography (SEEG). We extracted patient count  
17 data for comparisons of surgical outcome between two groups, based on a reported prognostic factor.  
18 We defined a clinically meaningful difference as the difference in seizure freedom for MRI positive  
19 (66.9%) versus negative (45.5%) from the largest study found. Based on 69 studies of surgery  
20 outcomes in patients undergoing SEEG, the median sample size was 38 patients, and the median  
21 statistical power was 24%. This implies at least a 17% chance a study with a significant result is  
22 false, assuming 1:1 pre-test odds. Results from simulation studies suggest that, if a typical SEEG  
23 study finds a significant effect, then the median observed effect size will be more than double the  
24 true effect size. We conclude that studies of epilepsy surgery outcomes using SEEG are often  
25 statistically underpowered, which limits the reproducibility and reliability of the literature. We  
26 discuss how statistical power could be improved.

27

28

29 **Key words:** Epilepsy surgery, Engel outcome, Seizure freedom, Statistical power

30 **1 INTRODUCTION**

31 Low statistical power is a recognized problem in many fields<sup>1,2</sup>, which means true effects will be  
32 missed, the chance a study with a significant result is false will be inflated<sup>3</sup>, and discovered true  
33 effects will be over-estimated<sup>4</sup>. In neuroscience the typical power to detect a true effect was  
34 estimated at 20%<sup>2</sup>. We recently highlighted the issue of low power in a single study of laser  
35 surgery<sup>5</sup>, but we suspected that low power was pervasive in studies of epilepsy surgery outcomes.  
36 We performed a systematic review to acquire a representative sample of papers reporting epilepsy  
37 surgery outcomes and determine the power of a typical study. We focus on  
38 stereoelectroencephalography (SEEG) to keep the review tractable, and because the recent adoption  
39 of this technique in the United States may lead to smaller number of patients and thus lower power.

40 A major challenge in any power analysis is determine the "clinical meaningful" effect size.  
41 This can be defined as how large of an effect we expect actually exists and that we want to be able to  
42 detect<sup>1</sup>. The largest study in the SEEG literature we know of is from the Milan group, which  
43 reported outcomes of freedom from disabling seizures following surgery in 470 patients<sup>6</sup>. We use  
44 this large cohort to estimate a clinical meaningful effect size as the (statistically significant)  
45 prognostic value of an abnormal MRI: 66.9% (204/305) of patients with an abnormal MRI were  
46 seizure-free, compared to 45.5% (75/165) patients with a normal MRI (odds ratio 2.4, 95% CI 1.6-  
47 3.5). The presence of a lesion on MRI is not the only relevant prognostic factor but is commonly  
48 reported in the literature.

49 In our meta-analysis, we extracted the number of patients who were divided into two groups  
50 (such as MRI positive or negative) and computed the power of that study to predict a difference in  
51 seizure freedom of 66.9% versus 45.5%. We review options for computing power. We discuss the  
52 issues raised by underpowered studies and highlight options for improving power.

## Low power in epilepsy surgery studies

5/11/22

53

## 54 2 METHODS

### 55 2.1 Literature Search

56 We performed a PubMed search with the terms "((SEEG) OR (stereoelectroencephalography)) AND  
57 (epilepsy) AND (surgery outcome)" for the year of publication from 1980 to 2020, last performed  
58 March 2, 2021. One of us (ASD) reviewed each abstract, and then examined the full manuscript  
59 when the abstract described a comparison of surgery outcome between two groups. Inclusion  
60 criteria were 1) studies of patients undergoing SEEG that 2) report a comparison of surgical outcome  
61 (good or bad) based on a prognostic factor. Exclusion criteria included reviews, small case series, or  
62 mixed populations of SEEG and subdural grids. Raw patient counts were extracted for the  
63 comparison most emphasized in the abstract. If raw patient counts were not reported as a two-by-  
64 two table, we inferred the patient counts from information given in the text. Patient counts for each  
65 included study are reported in the supplement (Appendix S1).

66

### 67 2.2 Calculation of power

68 We estimated the power of the Chi-square test for a difference in proportions using three methods.  
69 First, we simulated binomial count data for each group using our predefined plausible effect size<sup>6</sup>  
70 (66.9% vs. 44.5%). We simulated 10,000 repetitions and report the power as the percentage of  
71 repetitions where a Chi-square test reported a p-value  $\leq 0.05$ . We did this for each study using the  
72 reported number of patients in each group. This software analysis was done in MATLAB (version  
73 R2016b, Mathworks, Natick, MA) using the function **chisquarecont**, available on the MATLAB  
74 Central File Exchange<sup>7</sup>.

## Low power in epilepsy surgery studies

5/11/22

75 Second, we estimated the statistical power of the Chi-square test by approximation<sup>8</sup>  
76 (Equation 1) using the Gaussian cumulative density function ( $\Phi$ ) applied to a critical value, which is  
77 a function of the sample size ( $n_1$  and  $n_2$ ) and percent seizure free ( $p_1$  and  $p_2$ ) of each group, and the  
78 Z-score  $z_{\alpha/2}$  (1.96 if  $\alpha = 0.05$ ).

$$\Phi\left(\frac{|p_1 - p_2|}{\sqrt{p_1(1-p_1)/n_1 + p_2(1-p_2)/n_2}} - z_{\alpha/2}\right) \quad (\text{Equation 1})$$

81 Finally, we used the R package "Exact" and the function **power.exact.test** using method  
82 "pearson chisq" (R version 4.1.1, [www.r-project.org](http://www.r-project.org)) to compute power. Traditionally, Fisher's exact  
83 test is recommended if there is an expected cell count is less than 5, but is this is known to have  
84 lower power relative to a Chi-square test (and the equivalent Z-test) for many trial models<sup>9</sup>. For  
85 simplicity, we only consider Chi-square test, since if anything this will overestimate power relative  
86 to a mixture of Chi-square and Fisher's exact tests.

87

### 88 2.3 Chance a study with a significant result is false

89 A p-value is the probability of obtaining a test statistic from an independent study as or more  
90 extreme than the statistic from the observed study, assuming the null hypothesis is true<sup>10</sup>. That is, the  
91 p-value is a probability based on observed data given the null hypothesis. The p-value does not  
92 measure the probability that the data were produced by chance alone, or the probability the null  
93 hypothesis is true<sup>11</sup>, which is a probability of the null hypothesis given the data. Bayes' Rule can be  
94 used to convert the probability of data given the null into the probability of the null given data. This  
95 requires the pre-study odds that the null hypothesis is true and, crucially, the statistical power. The  
96 positive predictive value (PPV) is given by the equation below, where  $(1-\text{Beta})$  is the power,  $\text{Beta}$  is  
97 the Type II error,  $\text{Alpha}$  is the Type I error, and  $R$  is the pre-test study odds<sup>2</sup> (Equation 1)

## Low power in epilepsy surgery studies

5/11/22

98

$$99 \quad \text{PPV} = ([1-\text{Beta}] \times R) / ([1-\text{Beta}] \times R + \text{Alpha}) \quad (\text{Equation 1})$$

100

101 We assume the pre-test odds  $R$  are 1:1, meaning the pre-test probability of the alternative  
102 hypothesis being true is 50%. This is the most optimistic plausible scenario. If the pre-test  
103 probability of the alternative is less than 50%, the PPV will be even lower<sup>3</sup>. The chance a study with  
104 a significant result is false is one minus the PPV (Equation 2).

105

$$106 \quad \text{Prob}(+\text{Study is False}) = 1 - \text{PPV} = \text{Alpha} / ([1-\text{Beta}] \times R + \text{Alpha}) \quad (\text{Equation 2})$$

107

### 108 2.4 Over-estimation of effect size

109 It is known that if a study is underpowered, then the an observed effect size will on average  
110 overestimate the true effect size if it is found to be statistically significant<sup>4</sup>. We define a "typical"  
111 SEEG study has having the median sample size with the median allocation ration across all included  
112 studies. Using the simulation paradigm described above, we quantify the over-estimation of a  
113 typical study by computing the median odds-ratio of runs with a Chi-square p-value <0.05, divided  
114 by the assumed odds ratio of 2.4.

115

## 116 3 RESULTS

117 We reviewed 119 manuscripts in detail, from the 268 abstracts returned by our search terms (and one  
118 added from citations). 69 studies met inclusion criteria, meaning they reported a comparison of  
119 good versus poor surgical outcome based on some prognostic factor in patients undergoing SEEG.

## Low power in epilepsy surgery studies

5/11/22

120 The median sample size was 38 patients (range 8-470). We estimated power using our  
121 assumed effect size of 66.9% vs. 45.5% seizure freedom between two groups. The median power  
122 using a chi-square test was 24% (range 7-99%) using the exact calculation using R or the simulation-  
123 based approach. The power was 22% using the Gaussian approximation, which slightly under-  
124 estimated the true power (Figure 1A). A power of 24% corresponds to a 17% ( $0.05/[0.24+0.05]$ )  
125 chance that a study with a significant result (at  $p<0.05$ ) is false (Figure 1B).

126 The median allocation percentage was 63% of the patients in the positive group (roughly a  
127 2:1 ratio). We therefore define a "typical" SEEG study as having median sample size (38) with the  
128 median allocation percentage (63%), which rounds to 24 patients in the positive group and 14 in the  
129 negative group. Based on simulations, the median odds ratio that was significant at  $p<0.05$  was 5.4,  
130 which is more than double the assumed true odds ratio of 2.4 (Figure 1C). Thus, when a typical  
131 SEEG study finds a significant effect, its magnitude will be over-estimated.

132 Though clinical trials are often designed to achieve 80% statistical power, only 3% (2/69) of  
133 the surveyed studies had greater than 80% power to detect our assumed effect size. We highlight the  
134 seven studies which had more than 50% power to detect our assumed effect size (Table 1).

135

## 136 4 DISCUSSION

137 Based on a representative sample of 69 studies of epilepsy surgery outcomes in SEEG, we  
138 estimate that the median study has only 24% power to detect a clinically meaningful effect. Though  
139 we focused on SEEG, we expect low power is common in studies of epilepsy surgery. An  
140 underpowered study (by definition) has a low chance to detect a true effect when present. However,  
141 some studies incorrectly interpret absence of evidence as evidence of absence. If an underpowered  
142 study finds no statistical difference in seizure freedom between an MRI positive and MRI negative



## Low power in epilepsy surgery studies

5/11/22

143 group, then it is incorrect to conclude that MRI could not at least partially predict seizure freedom.

144 If the study power is less than 50%, a negative result is expected even if the effect is real.

145 Another statistical fallacy is treating a result significant at  $p < 0.05$  as only having a 5%  
146 chance of being false<sup>11</sup>. The median SEEG study with 24% power has at least a 17% chance of  
147 being false, based on power considerations alone. Moreover, if an underpowered study finds a  
148 significant effect, it will over-estimate the effect size. Such limitations of low power are rarely  
149 discussed in epilepsy literature.

150 The biggest limitation of this study is our reliance on a single study of MRI positive vs.  
151 negative to determine the clinically meaningful effect size. There are countless possible prognostic  
152 factors, which may have different true effect sizes, which will be need quantified in future (ideally  
153 well-powered) studies. Our recommendation is that authors perform their own formal statistical  
154 power analysis, with an explicit definition of the clinically meaningful effect size. If the study is  
155 underpowered, that should be discussed in the interpretation of the results.

156 The most obvious (and most difficult) way to increase power is to include more subjects.  
157 This can be done by combining data across institutions, as done by one study highlighted here<sup>12</sup>. A  
158 less obvious way to increase power is to expand statistical analysis beyond the comparison of two-  
159 by-two tables of binary predictors and surgical outcomes. For example, we have shown that using  
160 ordinal regression using the full ordinal Engel surgical outcomes increases power relative to  
161 traditional binary logistic regression<sup>13</sup>. A similar increase in power should be possible by using  
162 continuous or ordinal predictors, rather than binary predictors.

163

164 **5 CONCLUSION**

## Low power in epilepsy surgery studies

5/11/22

165           Studies of epilepsy surgery outcomes in SEEG are systematically underpowered. Future  
166 studies should perform formal power analyses, and low power should be addressed by increasing the  
167 sample size and/or by statistical analysis which avoids unnecessary dichotomization. We call for  
168 increased statistical rigor in studies of surgery outcomes, as well as greater collaboration within the  
169 epilepsy community, with the goal of providing accurate and precise information to guide treatment  
170 for our patients with epilepsy.

171

172

173

174

## Low power in epilepsy surgery studies

5/11/22

### FUNDING AND ACKNOWLEDGEMENTS

175 N.P.P. is supported by the Woodruff Foundation, CURE Epilepsy, and NIH grants K08 NS105929,  
176 R01 NS088748, and R21 NS122011. A.S.D. is supported by the National Center for Advancing  
177 Translational Sciences of the NIH under award number UL1 TR002378 and KL2 TR002381. R.T.K.  
178 is supported by R01 GM113243. The content is solely the responsibility of the authors and does not  
179 necessarily represent the official views of the National Institutes of Health. MATLAB and R code  
180 which can be used to reproduce the analyses and figures described here will be posted at  
181 <https://github.com/adamsdickey>.

182

### AUTHORSHIP STATEMENTS

183 A.S.D and N.P.P. contributed to the conception and design of the study. A.S.D, R.T.K and N.P.P  
184 contributed to the drafting of the text. A.S.D. performed the statistical analysis and prepared the  
185 figures and tables

186

### DISCLOSURE OF CONFLICTS OF INTEREST

187 N.P.P. has served as a paid consultant for DIXI Medical USA, who manufactures products used in  
188 the workup for epilepsy surgery. The terms of this arrangement have been reviewed and approved by  
189 Emory University in accordance with its conflict-of-interest policies. A.S.D and R.T.K. have no  
190 conflicts of interest to disclose. We confirm that we have read the Journal's position on issues  
191 involved in ethical publication and affirm that this report is consistent with those guidelines

192

## Low power in epilepsy surgery studies

5/11/22

### FIGURES

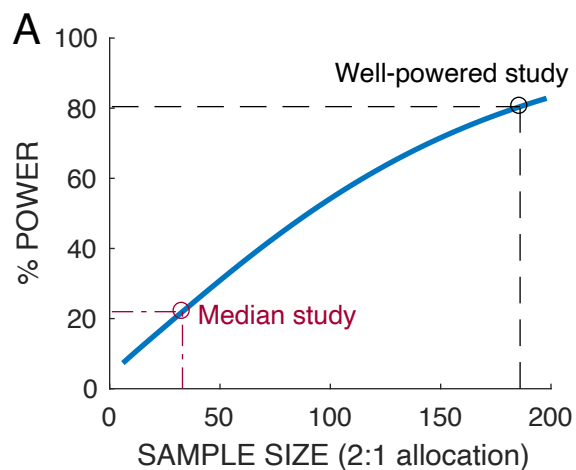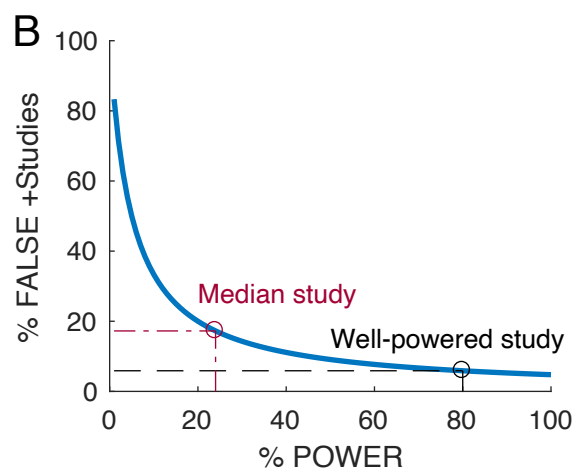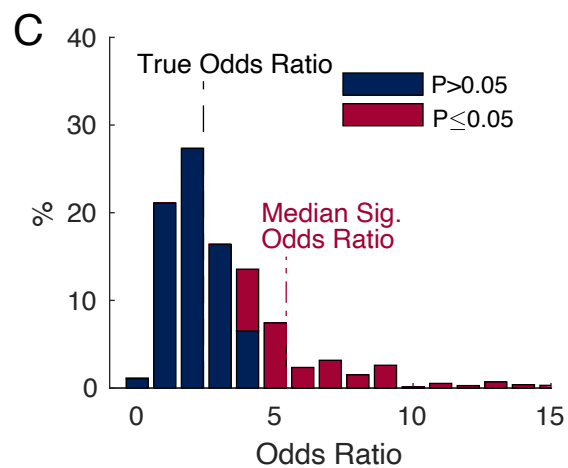

194 **FIGURE LEGEND**

195

196 **Figure 1: A) Statistical power compared to sample size** Assuming 2:1 allocation, a study would  
197 need 186 subjects (124 vs. 62) to have 80% statistical power to detect a difference in seizure  
198 freedom of 66.9% in group 1 and 45.5% in group 2 (odds ratio 2.4). However, the median SEEG  
199 study has only around 24% power to detect this difference. **B) Statistical power compared to**  
200 **chance study is false.** Assuming a pre-test probability of 50% that the alternative hypothesis is true  
201 and a statistical test with  $\alpha = 0.05$ , the chance a study with 80% statistical power which a  
202 significant result is false is 5.9%. However, the median EEG study with 24% statistical power with a  
203 significant result has a 17% chance of being false. **C) Median odds ratio for significant versus**  
204 **non-significant results.** We defined a "typical" SEEG study as having the median sample size (38)  
205 with the median allocation percentage (63%), which rounded to 24 subjects in group 1 and 14 in  
206 group 2. When this experiment is simulated, the median odds ratio that is significant at  $p < 0.05$  is 5.4,  
207 which is more than double the true odds ratio of 2.4. Thus a typical underpowered study, if it finds  
208 an significant result, will overestimate the effect size.

## Low power in epilepsy surgery studies

5/11/22

### REFERENCES

- 209
- 210 1. Cohen J. The statistical power of abnormal-social psychological research: A review The  
211 Journal of Abnormal and Social Psychology. 1962 1962/09//;65:145-153.
- 212 2. Button KS, Ioannidis JP, Mokrysz C, Nosek BA, Flint J, Robinson ES, et al. Power failure:  
213 why small sample size undermines the reliability of neuroscience Nat Rev Neurosci. 2013  
214 May;14:365-376.
- 215 3. Ioannidis JPA. Why Most Published Research Findings Are False PLoS Med. 2005  
216 2005/08/30//;2:e124.
- 217 4. Ioannidis JPA. Why Most Discovered True Associations Are Inflated Epidemiology. 2008  
218 2008/09//;19:640-648.
- 219 5. Dickey AS, Pedersen NP. Low statistical power in a study predicting seizure outcome  
220 Epilepsia. 2021 Oct;62:2565-2566.
- 221 6. Cardinale F, Rizzi M, Vignati E, Cossu M, Castana L, d'Orio P, et al.  
222 Stereoelectroencephalography: retrospective analysis of 742 procedures in a single centre Brain.  
223 2019 Sep 1;142:2688-2704.
- 224 7. Moulos P. Chi-square test - contingency tables Available at:  
225 <https://www.mathworks.com/matlabcentral/fileexchange/18705-chi-square-test-contingency-tables>.  
226 Accessed November 30.
- 227 8. Wang H, Chow S-C. Sample Size Calculation for Comparing Proportions. Wiley  
228 Encyclopedia of Clinical Trials 2007. p. 1-11.
- 229 9. Collins MW, Morris SB. Testing for adverse impact when sample size is small Journal of  
230 Applied Psychology. 2008 2008;93:463.

## Low power in epilepsy surgery studies

5/11/22

- 231 10. Biau DJ, Jolles BM, Porcher R. P Value and the Theory of Hypothesis Testing: An  
232 Explanation for New Researchers Clinical Orthopaedics & Related Research. 2010  
233 2010/03//;468:885-892.
- 234 11. Wasserstein RL, Lazar NA. The ASA Statement on *p*-Values: Context, Process, and  
235 Purpose The American Statistician. 2016 2016/04/02//;70:129-133.
- 236 12. Trebuchon A, Racila R, Cardinale F, Lagarde S, McGonigal A, Lo Russo G, et al. Electrical  
237 stimulation for seizure induction during SEEG exploration: a useful predictor of postoperative  
238 seizure recurrence? J Neurol Neurosurg Psychiatry. 2020 Oct 28.
- 239 13. Dickey AS, Krafty RT, Pedersen NP. Ordinal regression increases statistical power to predict  
240 epilepsy surgical outcomes. preprint. Neurology, 2021 2021/10/04/. Report No.
- 241 14. Cossu M, Cardinale F, Castana L, Citterio A, Francione S, Tassi L, et al.  
242 Stereoelectroencephalography in the Presurgical Evaluation of Focal Epilepsy: A Retrospective  
243 Analysis of 215 Procedures Neurosurgery. 2005;57:706-718.
- 244 15. Grewal SS, Alvi MA, Perkins WJ, Cascino GD, Britton JW, Burkholder DB, et al.  
245 Reassessing the impact of intraoperative electrocorticography on postoperative outcome of patients  
246 undergoing standard temporal lobectomy for MRI-negative temporal lobe epilepsy J Neurosurg.  
247 2019 Feb 22;132:605-614.
- 248 16. Lagarde S, Buzori S, Trebuchon A, Carron R, Scavarda D, Milh M, et al. The repertoire of  
249 seizure onset patterns in human focal epilepsies: Determinants and prognostic values Epilepsia. 2019  
250 Jan;60:85-95.
- 251 17. Bourdillon P, Isnard J, Catenoix H, Montavont A, Rheims S, Ryvlin P, et al. Stereo  
252 electroencephalography-guided radiofrequency thermocoagulation (SEEG-guided RF-TC) in drug-  
253 resistant focal epilepsy: Results from a 10-year experience Epilepsia. 2017 Jan;58:85-93.

## Low power in epilepsy surgery studies

5/11/22

- 254 18. Tassi L, Garbelli R, Colombo N, Bramerio M, Russo GL, Mai R, et al. Electroclinical, MRI  
255 and surgical outcomes in 100 epileptic patients with type II FCD Epileptic Disord. 2012 Sep;14:257-  
256 266.  
257



## Low power in epilepsy surgery studies

5/11/22

**TABLE**

| Author                   | Year | Ntot | N1  | N2  | Power | (+) Finding               | Outcome   | SR (+) | SR (-) |
|--------------------------|------|------|-----|-----|-------|---------------------------|-----------|--------|--------|
| Cardinale <sup>6</sup>   | 2019 | 470  | 305 | 165 | 99%   | MRI lesion                | Engel I   | 67%    | 45%    |
| Trebuchon <sup>12</sup>  | 2020 | 346  | 120 | 226 | 97%   | Seizure induced with LFS  | Engel I   | 72%    | 59%    |
| Cossu <sup>14</sup>      | 2005 | 165  | 123 | 42  | 70%   | MRI lesion                | Engel I   | 63%    | 38%    |
| Grewal <sup>15</sup>     | 2019 | 127  | 75  | 46  | 65%   | Full ECOG field resection | Excellent | 65%    | 52%    |
| Lagarde <sup>16</sup>    | 2018 | 143  | 114 | 29  | 57%   | Low-voltage fast activity | Engel I   | 60%    | 31%    |
| Bourdillon <sup>17</sup> | 2017 | 91   | 44  | 47  | 56%   | Favorable initial RF-TC   | Good      | 93%    | 55%    |
| Tassi <sup>18</sup>      | 2012 | 100  | 66  | 34  | 55%   | Balloon cell histology    | Engel I   | 88%    | 74%    |

258

259 **Table 1: Selected SEEG studies with greater than 50% statistical power.** Power was calculated  
260 assuming to detect a difference in seizure freedom of 66.9% in group 1 and 45.5% in group 2 (Odds  
261 Ratio 2.4). Only 7/69 (10%) of studies have more than 50% power. Column titles report the first  
262 author (Author), year of publication (Year), total sample size (Ntot) and size of the positive (N1) and  
263 negative group (N2), the estimated power (Power), the finding present in the positive group (+  
264 Finding), surgical outcome (Outcome), and the percentage of patients with seizure reduction in the  
265 positive (SR+) or negative group (SR-). Abbreviations: MRI magnetic resonance imaging, LFS low  
266 frequency stimulation, ECOG electrocorticography, RF-TC radiofrequency thermocoagulation.

267

268

269

270

271

272

## Low power in epilepsy surgery studies

5/11/22

273 **Appendix S1: Raw patient counts from 69 studies.** For left to right, columns list the paper ID (#),  
 274 the first author (First Author), year of publication (Year), journal of publication, (Journal), the total  
 275 sample size (nTot) and the size of the positive (N1) and negative (N2) prognostic groups.

| #  | First_Author      | Year | Journal                  | nTot | N1  | N2 |
|----|-------------------|------|--------------------------|------|-----|----|
| 1  | Brekelmans        | 1998 | Epilepsia                | 44   | 34  | 10 |
| 2  | Chassoux          | 2000 | Brain                    | 27   | 22  | 5  |
| 3  | Trinka            | 2000 | Epileptic Disord         | 24   | 8   | 16 |
| 4  | Cossu             | 2005 | Neursurgery              | 165  | 123 | 42 |
| 5  | Cossu             | 2005 | J Neurosurg              | 35   | 29  | 6  |
| 6  | Sindou            | 2006 | Acta Neurochir           | 100  | 87  | 13 |
| 7  | McGonigal         | 2007 | Brain                    | 60   | 40  | 20 |
| 8  | Rheims            | 2008 | Epilepsy Research        | 15   | 10  | 5  |
| 9  | Devaux            | 2008 | Neurochirurgie           | 74   | 64  | 10 |
| 10 | Catenoix          | 2008 | Neurology                | 41   | 21  | 20 |
| 11 | Aubert            | 2009 | Brian                    | 28   | 8   | 21 |
| 12 | Chassoux          | 2010 | Neurology                | 23   | 10  | 13 |
| 13 | Regis             | 2011 | Neurosurgery             | 12   | 8   | 4  |
| 14 | Chassoux          | 2012 | Epilepsia                | 62   | 25  | 37 |
| 15 | Liava             | 2012 | Epilepsy and Behavior    | 53   | 39  | 13 |
| 16 | Tassi             | 2012 | Epileptic Disord         | 100  | 66  | 34 |
| 17 | Wasade            | 2013 | Brit Jour of Neurosurg   | 16   | 10  | 6  |
| 18 | Gonzalez-Martinez | 2013 | Epilepsia                | 53   | 28  | 25 |
| 19 | Jung              | 2013 | Brain                    | 11   | 7   | 4  |
| 20 | Antony            | 2013 | Plos One                 | 23   | 11  | 12 |
| 21 | Chassoux          | 2012 | Neurology                | 37   | 33  | 4  |
| 22 | Liava             | 2014 | Epileptic Disord         | 62   | 45  | 17 |
| 23 | Taussig           | 2014 | Epileptic Disord         | 51   | 19  | 32 |
| 24 | Catenoix          | 2015 | Neurosurgery             | 16   | 8   | 8  |
| 25 | Cossu             | 2015 | J Neurosurg              | 89   | 14  | 75 |
| 26 | Gonzelez-Martinez | 2016 | Neurosurgery             | 68   | 37  | 31 |
| 27 | Barba             | 2016 | Brain                    | 168  | 150 | 18 |
| 28 | Lagarde           | 2016 | Epilepsia                | 53   | 44  | 9  |
| 29 | Murakami          | 2016 | Brain                    | 50   | 26  | 24 |
| 30 | Bourdillon        | 2017 | Epilepsia                | 91   | 44  | 47 |
| 31 | Dimova            | 2017 | Epilepsia                | 23   | 8   | 15 |
| 32 | Kubota            | 2017 | Clin Neuro and Neurosurg | 11   | 4   | 7  |
| 33 | Bonini            | 2017 | Neurosurgery             | 38   | 24  | 14 |
| 34 | Wang              | 2017 | NeuroImage: Clinical     | 43   | 27  | 16 |

## Low power in epilepsy surgery studies

5/11/22

|    |                  |      |                            |     |     |     |
|----|------------------|------|----------------------------|-----|-----|-----|
| 35 | Mirandola        | 2017 | Epilepsia                  | 20  | 16  | 4   |
| 36 | Roessler         | 2017 | World Neurosurgery         | 24  | 11  | 13  |
| 37 | Youngerman       | 2018 | Epilepsia                  | 30  | 18  | 12  |
| 38 | Vaugier          | 2018 | Epilepsy and Behavior      | 12  | 8   | 4   |
| 39 | Nagahama         | 2018 | J Neurosurg                | 33  | 29  | 4   |
| 40 | Lagarde          | 2018 | Epilepsia                  | 143 | 114 | 29  |
| 41 | McGovern         | 2018 | J Neurosurg Pediatr        | 42  | 21  | 21  |
| 42 | Steriade         | 2019 | Epilepsia                  | 75  | 61  | 14  |
| 43 | Thorsteinsdottir | 2019 | Journal of Neurology       | 70  | 42  | 28  |
| 44 | Grewal           | 2019 | J Neurosurg                | 127 | 75  | 46  |
| 45 | Tandon           | 2019 | JAMA Neurology             | 57  | 36  | 39  |
| 46 | Popescu          | 2019 | J Neuroimaging             | 16  | 5   | 11  |
| 47 | Rizzi            | 2019 | J Neurosurg                | 42  | 36  | 6   |
| 48 | Lagarde          | 2019 | Journal of Neurology       | 59  | 42  | 17  |
| 49 | Mariani          | 2019 | Journal of Neurology       | 46  | 28  | 18  |
| 50 | Mullati          | 2019 | Epilepsia                  | 14  | 9   | 5   |
| 51 | Liu              | 2019 | Int J of Neuroscience      | 47  | 37  | 10  |
| 52 | Cardinale        | 2019 | Brain                      | 470 | 305 | 165 |
| 53 | Duhrsen          | 2020 | Neurosurgical Review       | 18  | 8   | 10  |
| 54 | Peedicail        | 2020 | Acta Neurol Scand          | 23  | 11  | 12  |
| 55 | Kappen           | 2020 | Seizure: Eur J of Epilepsy | 8   | 5   | 3   |
| 56 | Mohamed          | 2020 | Neurosurg Focus            | 41  | 23  | 18  |
| 57 | Gao              | 2020 | Epilepsy Research          | 19  | 10  | 9   |
| 58 | Steriade         | 2020 | Clinical Neurophysiology   | 16  | 9   | 7   |
| 59 | Qi               | 2020 | Frontiers in Human Neuro   | 19  | 17  | 2   |
| 60 | Feng             | 2020 | Clinical Neurophysiology   | 25  | 13  | 12  |
| 61 | Lesko            | 2020 | J Neurosurg Pediatr        | 54  | 37  | 17  |
| 62 | Gupta            | 2020 | Epilepsia                  | 32  | 16  | 16  |
| 63 | Zhao             | 2020 | J Neurosurg                | 25  | 14  | 11  |
| 64 | Fierain          | 2020 | Epilepsy and Behavior      | 12  | 7   | 5   |
| 65 | Yuan             | 2020 | Seizure: Eur J of Epilepsy | 31  | 23  | 8   |
| 66 | Zhang            | 2020 | Seizure: Eur J of Epilepsy | 42  | 27  | 15  |
| 67 | Trebuchon        | 2020 | J Neurol Neurosurg Psych   | 346 | 120 | 226 |
| 68 | Zaher            | 2020 | Frontiers in Neurology     | 9   | 4   | 5   |
| 69 | Yan              | 2020 | Chinese Medical Journal    | 30  | 18  | 12  |
